# Supplementary material for: Validation of the Simplified Malaysian Psychosocial Impact of Dental Aesthetics Questionnaire for the Sociodental Approach to Estimate the Orthodontic Treatment Need
Source: MDPI journal article supplement (doi:10.3390/ijerph19148665), 2022-07-16
Supplement: s1 [file s1]

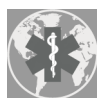

**Supplementary Materials:**

**Table S1.** Item impact method showing the impact scores of each PIDAQ[M] item (n= 35).

|                               | Item                                            | Frequency | Importance | Impact |
|-------------------------------|-------------------------------------------------|-----------|------------|--------|
| <b>Dental Self-Confidence</b> |                                                 |           |            |        |
| 4                             | Proud of own teeth                              | 0.23      | 1.50       | 0.34   |
| 7                             | Like to show their teeth <sup>a</sup>           | 0.20      | 1.86       | 0.37   |
| 12                            | Pleased to see own teeth in mirror <sup>a</sup> | 0.23      | 1.63       | 0.37   |
| 17                            | Teeth look nice to others                       | 0.17      | 1.33       | 0.23   |
| 21                            | Satisfied with own teeth's appearance           | 0.20      | 1.71       | 0.34   |
| 23                            | Find own teeth nice                             | 0.17      | 2.17       | 0.37   |
| <b>Psychological Impact</b>   |                                                 |           |            |        |
| 3                             | Envy others for their teeth                     | 0.71      | 2.32       | 1.66   |
| 6                             | Distressed because of others' nice teeth        | 0.71      | 2.52       | 1.80   |
| 10                            | Unhappy about own teeth                         | 0.83      | 2.17       | 1.80   |
| 11                            | Others have nicer teeth <sup>a</sup>            | 0.91      | 2.19       | 2.00   |
| 16                            | Feel bad about own teeth                        | 0.80      | 2.32       | 1.86   |
| 20                            | Wish to look better <sup>a</sup>                | 0.94      | 2.70       | 2.54   |
| <b>Social Impact</b>          |                                                 |           |            |        |
| 2                             | Hold back their smile <sup>a</sup>              | 0.86      | 2.67       | 2.29   |
| 5                             | What others think                               | 0.63      | 2.45       | 1.54   |
| 9                             | Teasing                                         | 0.74      | 2.50       | 1.86   |
| 13                            | People look strange at my teeth                 | 0.71      | 2.28       | 1.63   |
| 14                            | Shy because of own teeth                        | 0.51      | 2.22       | 1.14   |
| 15                            | Hiding own teeth                                | 0.51      | 2.28       | 1.17   |
| 19                            | Stupid comments from others                     | 0.63      | 2.50       | 1.57   |
| 22                            | Boys/Girls find own teeth ugly <sup>a</sup>     | 0.83      | 2.59       | 2.14   |
| <b>Aesthetic Concern</b>      |                                                 |           |            |        |
| 1                             | Don't like own teeth in mirror <sup>a</sup>     | 0.80      | 2.43       | 1.94   |
| 8                             | Don't like own teeth on photos <sup>a</sup>     | 0.83      | 2.55       | 2.12   |

<sup>a</sup> Selected items for the item impact method; Malaysian psychosocial impact of dental aesthetics questionnaire, PIDAQ[M].

**Table S2.** Regression method showing items in descending order that contribute to predicting the PIDAQ[M] scores (N=590).

| PIDAQ[M] items  |                 |                |                | Coefficient of final model    |        |         |             |
|-----------------|-----------------|----------------|----------------|-------------------------------|--------|---------|-------------|
| PI              | DSC             | SI             | AC             | Unstandardized coefficients B | t      | p-value | 95% CI      |
|                 |                 |                |                |                               |        |         | Lower Upper |
| 6 <sup>a</sup>  |                 |                |                | .933                          | 11.492 | 0.000*  | .774 1.092  |
| 16 <sup>a</sup> |                 |                |                | 1.158                         | 17.568 | 0.000*  | 1.029 1.288 |
|                 | 12 <sup>a</sup> |                |                | .992                          | 13.515 | 0.000*  | .848 1.136  |
|                 |                 | 9 <sup>a</sup> |                | .969                          | 16.440 | 0.000*  | .853 1.085  |
|                 |                 | 2 <sup>a</sup> |                | 1.042                         | 17.792 | 0.000*  | .927 1.157  |
|                 |                 | 19             |                | 1.087                         | 23.119 | 0.000*  | .995 1.179  |
|                 | 4 <sup>a</sup>  |                |                | 1.092                         | 16.919 | 0.000*  | .965 1.219  |
|                 |                 |                | 8 <sup>a</sup> | 1.151                         | 18.901 | 0.000*  | 1.031 1.270 |
| 11              |                 |                |                | 1.058                         | 18.886 | 0.000*  | .948 1.168  |
|                 | 21              |                |                | 1.092                         | 16.847 | 0.000*  | .965 1.219  |
|                 |                 | 5              |                | .972                          | 18.405 | 0.000*  | .868 1.075  |
|                 |                 | 22             |                | 1.000                         | 15.759 | 0.000*  | .875 1.125  |
| 3               |                 |                |                | 1.041                         | 20.424 | 0.000*  | .941 1.142  |
|                 |                 | 13             |                | 1.038                         | 13.509 | 0.000*  | .887 1.189  |
|                 | 7               |                |                | 1.027                         | 20.043 | 0.000*  | .926 1.128  |
|                 |                 |                | 1 <sup>a</sup> | 1.080                         | 16.183 | 0.000*  | .948 1.211  |
|                 |                 | 14             |                | 1.184                         | 16.799 | 0.000*  | 1.046 1.322 |
|                 | 17              |                |                | .938                          | 15.060 | 0.000*  | .816 1.061  |
| 20              |                 |                |                | .955                          | 16.801 | 0.000*  | .844 1.067  |
|                 |                 | 15             |                | 1.060                         | 16.465 | 0.000*  | .934 1.187  |
|                 | 23              |                |                | .969                          | 15.648 | 0.000*  | .848 1.091  |
| 10              |                 |                |                | .955                          | 13.454 | 0.000*  | .815 1.094  |

<sup>a</sup> Selected items for the regression method; Malaysian psychosocial impact of dental aesthetics questionnaire, PIDAQ[M]; psychological impact, PI; dental self-confidence, DSC; social impact, SI; aesthetic concern, AC; confidence interval, CI; \*p < 0.001.

**Table S3.** Internal consistency: Cronbach's alpha, scale statistics, and corrected item–total correlations of the simplified PIDAQ[M] forms (n= 590).

| Simplified PIDAQ[M] | Cronbach's $\alpha$ | Cronbach's $\alpha$ if item deleted | Scale statistics | Corrected item–total correlation |      |
|---------------------|---------------------|-------------------------------------|------------------|----------------------------------|------|
|                     |                     |                                     | Mean (SD)        | Min                              | Max  |
| ISP8                | 0.85                | 0.82–0.84                           | 15.1 (6.4)       | 0.35                             | 0.67 |
| RSP8                | 0.90                | 0.87–0.88                           | 11.8 (7.2)       | 0.56                             | 0.73 |

Impact-related need, IRN; propensity-related need, PRN; Malaysian psychosocial impact of dental aesthetics questionnaire, PIDAQ[M]; impact simplified PIDAQ[M], ISP8; regression simplified PIDAQ[M], RSP8; standard deviation, SD.

**Table S4.** Criterion validity: correlation coefficient between the simplified and original PIDAQ[M] forms (n = 590).

| Simplified PIDAQ[M] | Original PIDAQ[M] |         |
|---------------------|-------------------|---------|
|                     | rho               | p-value |
| ISP8                | 0.935             | 0.000*  |
| RSP8                | 0.960             | 0.000*  |

Malaysian psychosocial impact of dental aesthetics questionnaire, PIDAQ[M]; impact simplified PIDAQ[M], ISP8; regression simplified PIDAQ[M], RSP8; Spearman's correlation coefficient, rho; \*p < 0.001.

**Table S5.** Criterion validity: comparison of the simplified PIDAQ[M] forms with the CS-OIDPc index (n=590).

| Simplified<br>PIDAQ[M] | CS-OIDPc<br>prevalence | N   | Mann–Whitney U |     |           |        |       | Pearson correlation |                         |         |
|------------------------|------------------------|-----|----------------|-----|-----------|--------|-------|---------------------|-------------------------|---------|
|                        |                        |     | PIDAQ[M] score |     |           |        |       | p-value             | CS-OIDPc<br>performance | p-value |
|                        |                        |     | Mean           | SD  | Quartiles |        |       |                     |                         |         |
|                        |                        |     |                |     | Lower     | Middle | Upper |                     |                         |         |
| ISP8                   | No                     | 447 | 13.5           | 5.7 | 9.0       | 14.0   | 17.0  | 0.000*              | 0.461                   | 0.000*  |
|                        | Yes                    | 143 | 19.2           | 6.3 | 15.0      | 20.0   | 24.0  |                     |                         |         |
| RSP8                   | No                     | 447 | 9.9            | 6.1 | 5.0       | 9.0    | 14.0  | 0.000*              | 0.491                   | 0.000*  |
|                        | Yes                    | 143 | 17.7           | 7.3 | 12.0      | 18.0   | 22.0  |                     |                         |         |

Malaysian psychosocial impact of dental aesthetics questionnaire, PIDAQ[M]; condition-specific Child Oral Impacts on Daily Performances, CS-OIDPc; impact simplified PIDAQ[M], ISP8; regression simplified PIDAQ[M], RSP8; standard deviation, SD; \*p < 0.001.

**Table S6.** Convergent validity: comparison of the simplified PIDAQ[M] forms with participants' perception of the level of their dental appearance (n= 590).

| Simplified PI-<br>DAQ[M] | Rating of dental<br>appearance | N   | PIDAQ[M] score |     |           |        |       | p-value |
|--------------------------|--------------------------------|-----|----------------|-----|-----------|--------|-------|---------|
|                          |                                |     | Mean           | SD  | Quartiles |        |       |         |
|                          |                                |     |                |     | Lower     | Middle | Upper |         |
| ISP8                     | Excellent                      | 77  | 10.0           | 5.7 | 6.0       | 9.0    | 13.0  | 0.000*  |
|                          | Good                           | 283 | 12.9           | 5.0 | 9.0       | 13.0   | 16.0  |         |
|                          | Average                        | 182 | 18.0           | 4.7 | 15.0      | 18.0   | 21.0  |         |
|                          | Poor                           | 48  | 24.0           | 5.9 | 23.0      | 25.0   | 29.0  |         |
| RSP8                     | Excellent                      | 77  | 6.3            | 5.8 | 2.0       | 5.0    | 9.0   | 0.000*  |
|                          | Good                           | 283 | 8.9            | 5.0 | 6.0       | 9.0    | 12.0  |         |
|                          | Average                        | 182 | 15.5           | 5.6 | 12.0      | 15.5   | 19.0  |         |
|                          | Poor                           | 48  | 23.1           | 7.0 | 20.0      | 23.0   | 28.0  |         |

Malaysian psychosocial impact of dental aesthetics questionnaire, PIDAQ[M]; impact simplified PIDAQ[M], ISP8; regression simplified PIDAQ[M], RSP8; standard deviation, SD; \*p < 0.001.

**Table S7.** Convergent validity: comparison of the simplified PIDAQ[M] forms with participants' perception of their need for braces to correct their dental appearance (n= 590).

| Simplified<br>PIDAQ[M] | Need<br>braces | N   | Simplified PIDAQ[M] scores |     |           |        |       | p-value |
|------------------------|----------------|-----|----------------------------|-----|-----------|--------|-------|---------|
|                        |                |     | Mean                       | SD  | Quartiles |        |       |         |
|                        |                |     |                            |     | Lower     | Middle | Upper |         |
| ISP8                   | Yes            | 247 | 18.3                       | 6.3 | 14.0      | 18.0   | 23.0  | 0.000*  |
|                        | No             | 200 | 11.8                       | 5.1 | 8.0       | 12.0   | 15.8  |         |
| RSP8                   | Yes            | 247 | 15.9                       | 7.2 | 10.0      | 16.0   | 21.0  | 0.000*  |
|                        | No             | 200 | 8.0                        | 5.1 | 4.0       | 8.0    | 11.0  |         |

Malaysian psychosocial impact of dental aesthetics questionnaire, PIDAQ[M]; impact simplified PIDAQ[M], ISP8; regression simplified PIDAQ[M], RSP8; standard deviation, SD; \*p < 0.001.

**Table S8.** Discriminant validity: comparison of the simplified PIDAQ[M] forms with the severity of malocclusion as rated by the participants (MI-S) and investigators (MI-D) (= 590).

| Simplified PIDAQ[M] | MI-S |  | Quartile   |            | Effect size | p-value |
|---------------------|------|--|------------|------------|-------------|---------|
|                     | N    |  | Lower      | Upper      |             |         |
|                     |      |  | 147        | 147        |             |         |
|                     |      |  | Mean (SD)  | Mean (SD)  |             |         |
| ISP8                |      |  | 10.6 (5.4) | 20.0 (5.7) | 1.70        | 0.000*  |
| RSP8                |      |  | 6.5 (5.4)  | 17.8 (6.7) | 1.89        | 0.000*  |

  

| Simplified PIDAQ[M] | MI-D |  | Quartile   |            | Effect size | p-value |
|---------------------|------|--|------------|------------|-------------|---------|
|                     | N    |  | Lower      | Upper      |             |         |
|                     |      |  | 147        | 148        |             |         |
|                     |      |  | Mean (SD)  | Mean (SD)  |             |         |
| ISP8                |      |  | 12.6 (5.6) | 17.1 (5.6) | 0.74        | 0.000*  |
| RSP8                |      |  | 8.6 (6.1)  | 14.5 (7.3) | 0.88        | 0.000*  |

Self-rated malocclusion index, MI-S; investigator-rated malocclusion index, MI-D; Malaysian psychosocial impact of dental aesthetics questionnaire, PIDAQ[M]; impact simplified PIDAQ[M], ISP8; regression simplified PIDAQ[M], RSP8; standard deviation, SD; \*p < 0.001.

**Table S9.** Reproducibility of the simplified PIDAQ[M] forms (n=178).

| Simplified<br>PIDAQ[M] | ICC <sub>agreement</sub> | SEM  | SDC  | Paired t-test |      | Bland–Altman            |       |                   |
|------------------------|--------------------------|------|------|---------------|------|-------------------------|-------|-------------------|
|                        | (95% CI)                 |      |      | Diff          | (SD) | 95% limits of agreement |       |                   |
|                        |                          |      |      |               |      | Lower                   | Upper | Within limits (%) |
| ISP8                   | 0.84 (0.79-0.88)*        | 2.81 | 7.78 | 0.38          | 3.97 | -7.40                   | 8.16  | 94.4              |
| RSP8                   | 0.90 (0.87-0.93)*        | 3.13 | 8.67 | -0.12         | 4.42 | -8.78                   | 8.55  | 92.1              |

Malaysian psychosocial impact of dental aesthetics questionnaire, PIDAQ[M]; impact simplified PIDAQ[M], ISP8; regression simplified PIDAQ[M], RSP8; \*p < 0.05; confidence interval, CI; standard error of measurement, SEM; smallest detectable change, SDC; mean differences, Diff; standard deviation, SD.

**Table S10.** Distribution-based approach: changes in standardized simplified PIDAQ[M] scores (N=37).

| Simplified<br>PIDAQ[M] | Standardized<br>score |                | Change in standardized score |        |       |         |                             |                           |
|------------------------|-----------------------|----------------|------------------------------|--------|-------|---------|-----------------------------|---------------------------|
|                        | T0                    | T1             | T1-T0                        |        |       |         |                             |                           |
|                        | Mean<br>(SD)          | Mean<br>(SD)   | Mean change<br>(SD)          | 95% CI |       | p-value | Standardized<br>effect size | Effect size<br>descriptor |
|                        |                       |                |                              | Lower  | Upper |         |                             |                           |
| ISP8                   | 66.0<br>(19.9)        | 31.9<br>(18.4) | 34.0<br>(24.2)               | 26.0   | 42.1  | .000*   | 1.7                         | large                     |
| RSP8                   | 59.0<br>(21.3)        | 42.1<br>(19.2) | 16.9<br>(21.8)               | 9.6    | 24.2  | .000*   | 0.8                         | large                     |

Malaysian psychosocial impact of dental aesthetics questionnaire, PIDAQ[M]; impact simplified PIDAQ[M], ISP8; regression simplified PIDAQ[M], RSP8; pre-treatment, T0; post-treatment, T1; standard deviation, SD; confidence interval, CI; \*p < 0.001.

**Table S11.** Anchor-based approach: responsiveness of the simplified PIDAQ[M] forms to changes based on the global health transition scale following orthodontic treatment (N=37).

| Global health<br>transition scale | Simplified<br>PIDAQ[M] | Responsiveness to change at T1 |               |               |         |                                  |             |            |
|-----------------------------------|------------------------|--------------------------------|---------------|---------------|---------|----------------------------------|-------------|------------|
|                                   |                        | n                              | T0            | T1            | p-value | Change in<br>score,<br>mean (SD) | Effect size |            |
|                                   |                        |                                | Mean<br>(SD)  | Mean<br>(SD)  |         |                                  | d           | Descriptor |
| A little improved                 | ISP8                   | 7                              | 20.6<br>(7.1) | 10.4<br>(4.0) | .033*   | 10.1 (9.7)                       | 1.8         | Large      |
|                                   | RSP8                   |                                | 18.7<br>(7.9) | 7.9<br>(4.9)  | .029*   | 10.9 (10.1)                      | 1.6         | Large      |
| Much improved                     | ISP8                   | 30                             | 21.2<br>(6.0) | 10.2<br>(6.3) | .000*   | 11.1 (7.4)                       | 1.8         | Large      |
|                                   | RSP8                   |                                | 18.9<br>(6.7) | 8.2<br>(6.9)  | .000*   | 10.7 (7.9)                       | 1.6         | Large      |

Malaysian psychosocial impact of dental aesthetics questionnaire, PIDAQ[M]; impact simplified PIDAQ[M], ISP8; regression simplified PIDAQ[M], RSP8; pre-treatment, T0; post-treatment, T1; standard deviation, SD; confidence interval, CI; \*p < 0.001.
